# Supplementary material
Source: PubMed Central journal article supplement (PMC3197351)

**Supplementary Figure 1. Immunohistochemistry of Mouse Aortas for AMPK by a second antibody. Determination of pattern similarity with CS Ab.**

No Primary Ab (40X)

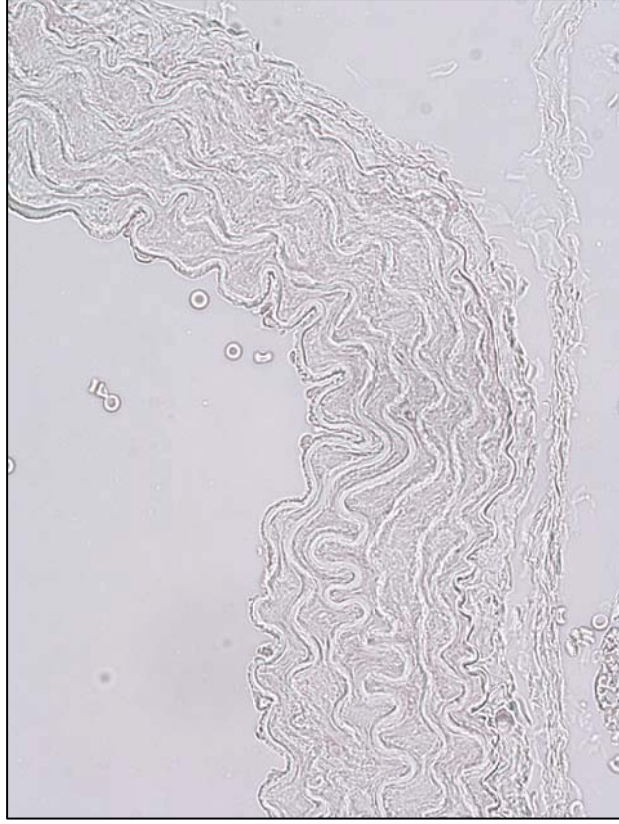

AMPK alpha1 (Abcam) 1:50 (40X)

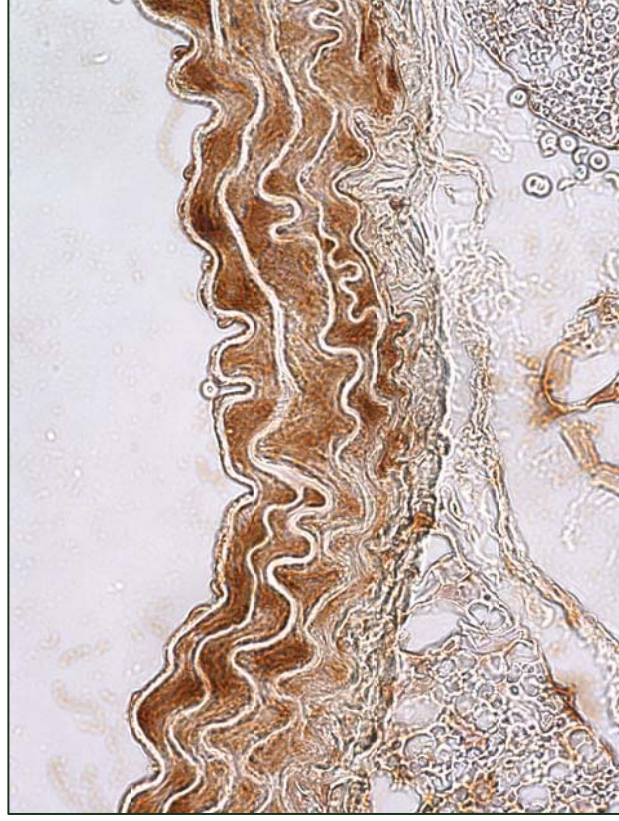

Supplement: supp_01279.2010_figS1.pdf [file supp_01279.2010_figS1.pdf]
