# Supplementary material
Source: PubMed Central journal article supplement (PMC3197351)
Supplement: supp_01279.2010_figS6.pdf [file supp_01279.2010_figS6.pdf]

pS1177-eNOS (Upstate) 1:100 (Sedentary)

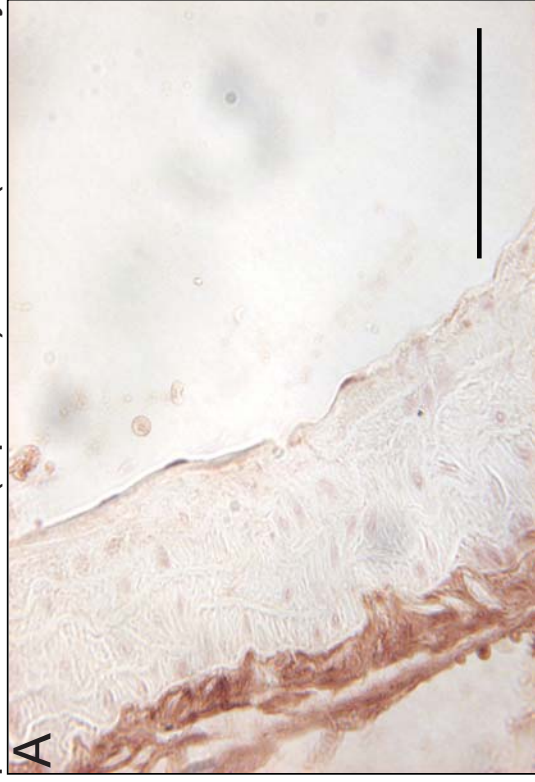

pS1177-eNOS (Upstate) 1:100 (Exercised)

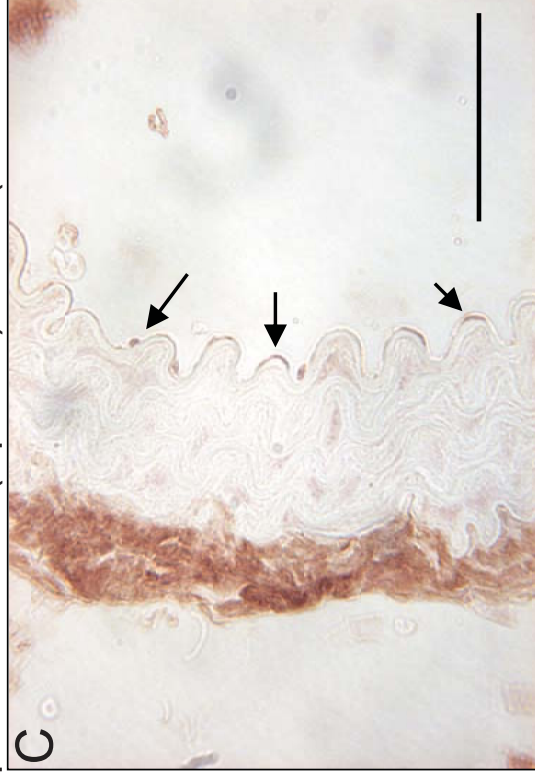

**E**

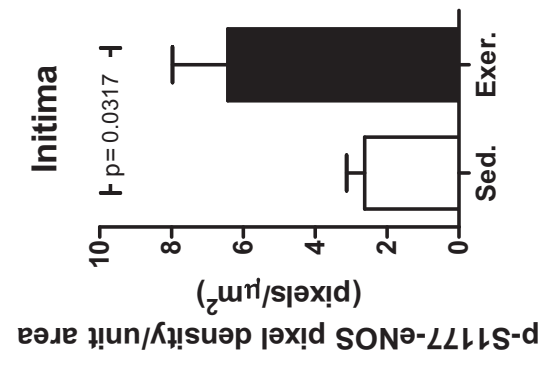

pS1177-eNOS (Upstate) 1:100 (Sedentary)



pS1177-eNOS (Upstate) 1:100 (Sedentary)

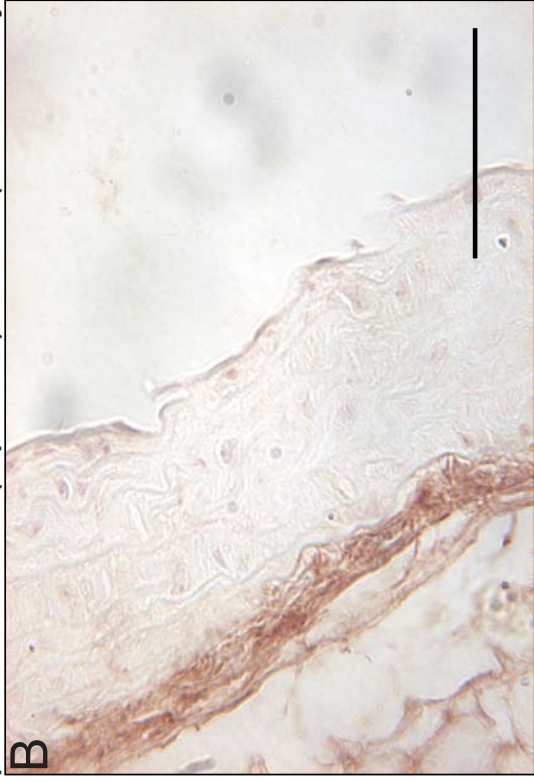

pS1177-eNOS (Upstate) 1:100 (Exercised)

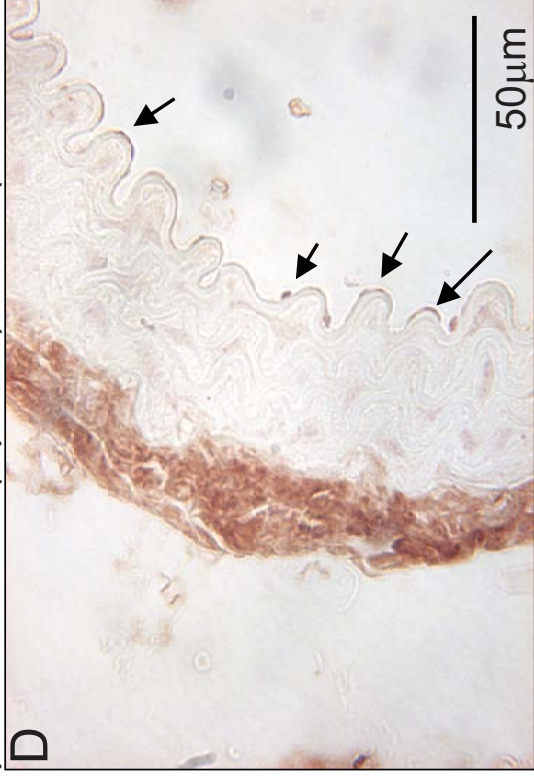

**F**

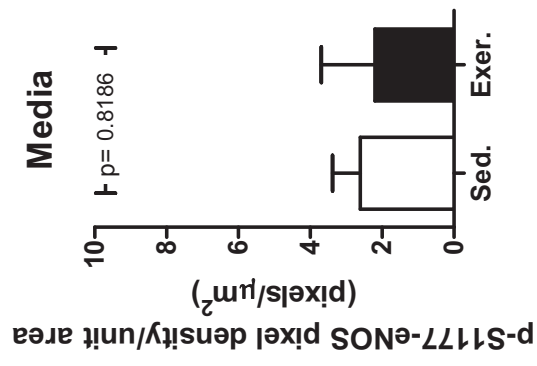

Fig 8
