# Supplementary material
Source: PubMed Central journal article supplement (PMC3197351)
Supplement: supp_01279.2010_tableS1.pdf [file supp_01279.2010_tableS1.pdf]

**Supplementary Table 1. Antibodies used for western blots and immunohistochemistry.**

| Antibody                  | Clone /Cat. No. | Dilution |       | Source | Incubation | Supplier                           |
|---------------------------|-----------------|----------|-------|--------|------------|------------------------------------|
|                           |                 | W        | I     |        |            |                                    |
| ACC                       | 07-439          | 1:1000   |       | Rabbit | O/N, 4°C   | Upstate/Millipore, (Billerica, MA) |
| ACC mAb                   | 3676            |          | 1:50  | Rabbit | O/N, 4°C   | Cell Signaling                     |
| p-S79-ACC                 | 07-303          | 1:1000   |       | Rabbit | O/N, 4°C   | Upstate/Millipore                  |
| Akt                       | 9272            | 1:1000   |       | Rabbit | O/N, 4°C   | Cell Signaling                     |
| p-S473-Akt                | 9271            | 1:1000   |       | Rabbit | O/N, 4°C   | Cell Signaling                     |
| p-T308-Akt                | 9275            | 1:1000   |       | Rabbit | O/N, 4°C   | Cell Signaling                     |
| AMPK- $\alpha$            | 2532            | 1:1000   | 1:100 | Rabbit | O/N, 4°C   | Cell Signaling                     |
| AMPK- $\alpha$ 1          | Ab3759-51       |          | 1:50  | Rabbit | O/N, 4°C   | Abcam                              |
| p-T172-AMPK- $\alpha$ mAb | 2535 (40H9)     | 1:1000   | 1:100 | Rabbit | O/N, 4°C   | Cell Signaling                     |
| aP2 (FABP4)               | 3544            | 1:1000   |       | Rabbit | O/N, 4°C   | Cell Signaling                     |
| $\beta$ -actin            | AC-74           | 1:500    |       | Mouse  | O/N, 4°C   | Sigma                              |
| CaMKI                     | H-8             | 1:1000   |       | Mouse  | O/N, 4°C   | SCBT                               |
| p-T177-CaMKI              | sc-28438-R      | 1:1000   |       | Rabbit | O/N, 4°C   | SCBT                               |
| CREB                      | 9192            | 1:1000   |       | Rabbit | O/N, 4°C   | Cell Signaling                     |
| p-S133-CREB               | 9191            | 1:1000   |       | Rabbit | O/N, 4°C   | Cell Signaling                     |
| eNOS                      | sc-654          | 1:1000   | 1:50  | Rabbit | O/N, 4°C   | SCBT                               |
| p-S617-eNOS               | 07-561          | 1:1000   |       | Rabbit | O/N, 4°C   | Upstate/Millipore                  |
| p-S635-eNOS               | 07-562          | 1:1000   |       | Rabbit | O/N, 4°C   | Upstate/Millipore                  |
| p-S1177-eNOS              | 9571            | 1:1000   | 1:100 | Rabbit | O/N, 4°C   | Cell Signaling                     |
| p-T495-eNOS               | 9574            | 1:1000   |       | Rabbit | O/N, 4°C   | Cell Signaling                     |
| GSK-3 $\beta$             | 7/GSK-3b        | 1:1000   |       | Mouse  | O/N, 4°C   | BD Transduction Laboratories       |
| p-S9-GSK-3 $\beta$        | 9336            | 1:1000   |       | Rabbit | O/N, 4°C   | Cell Signaling                     |
| LKB1                      | Ley 37D/G6      | 1:1000   | 1:50  | Mouse  | O/N, 4°C   | SCBT                               |
| p-S431-LKB1               | 3051            | 1:1000   |       | Rabbit | O/N, 4°C   | Cell Signaling                     |
| p-(S/T) PKA Substrates    | 9621S           | 1:1000   |       | Rabbit | O/N, 4°C   | Cell Signaling                     |
| SIRT1                     | 07-131          | 1:1000   | 1:50  | Rabbit | O/N, 4°C   | Upstate/Millipore                  |
| Src                       | GD11            | 1:1000   |       | Mouse  | O/N, 4°C   | Upstate/Millipore                  |
| p-Y416-Src                | 9A6             | 1:1000   |       | Mouse  | O/N, 4°C   | Upstate/Millipore                  |
| Anti-Rabbit-HRP           | NA934V          | 1:10,000 |       | Donkey | 1 hr, RT   | Amersham (Piscataway, NJ)          |
| Anti-Mouse-HRP            | NXA931          | 1:10,000 |       | Sheep  | 1 hr, RT   | Amersham                           |

W, dilution used for western blotting; I, dilution used for immunohistochemistry; O/N, overnight; RT, room temperature.
