# Supplementary material
Source: PubMed Central journal article supplement (PMC3197351)

No Primary Ab (63X)

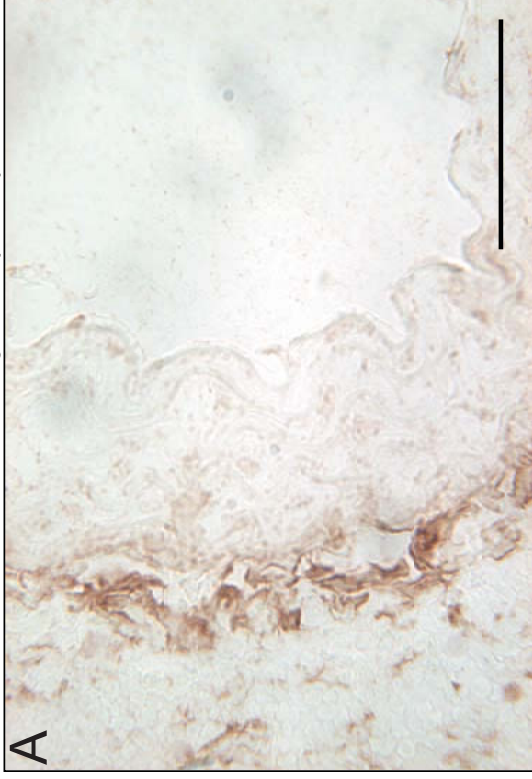

pT172-AMPK mAb (CS) 1:100 (Exercised)

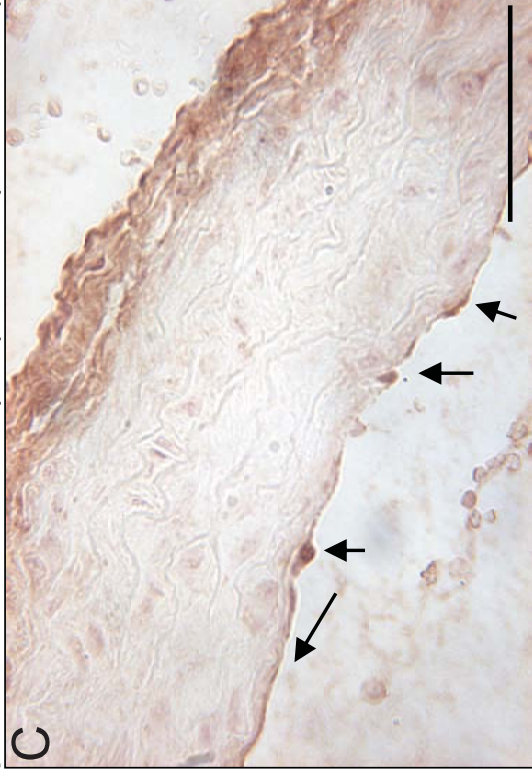

pT172-AMPK mAb (CS) 1:100 (Sedentary)

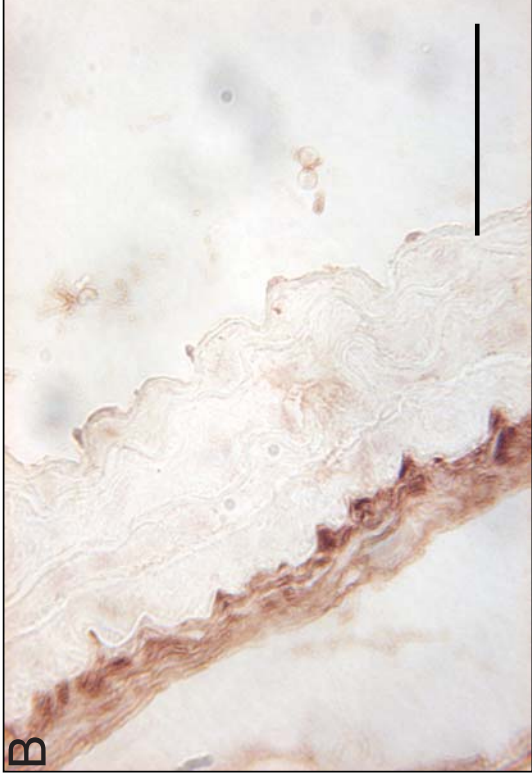

pT172-AMPK mAb (CS) 1:100 (Exercised)

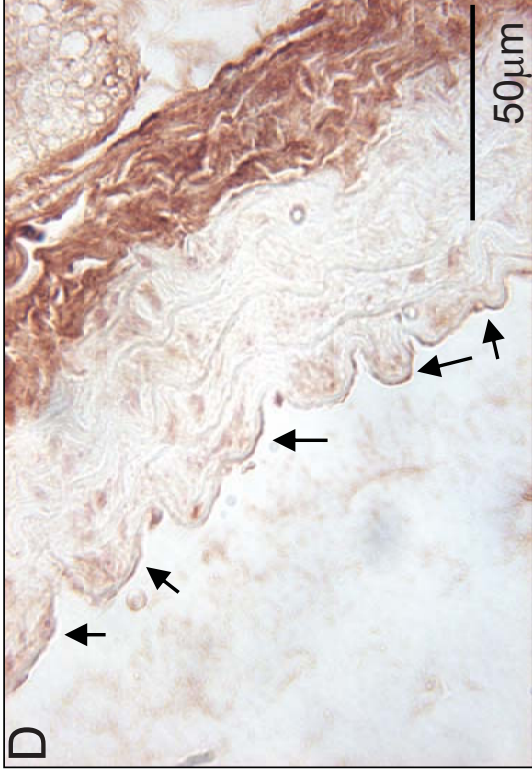

E

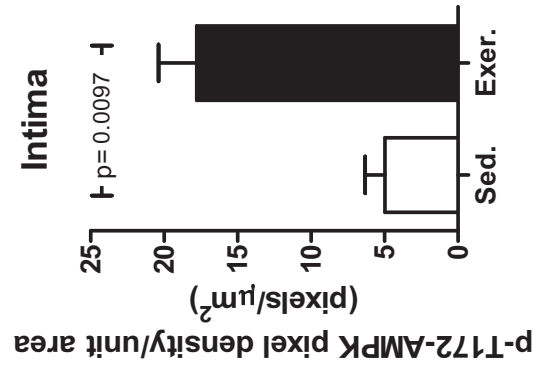

F

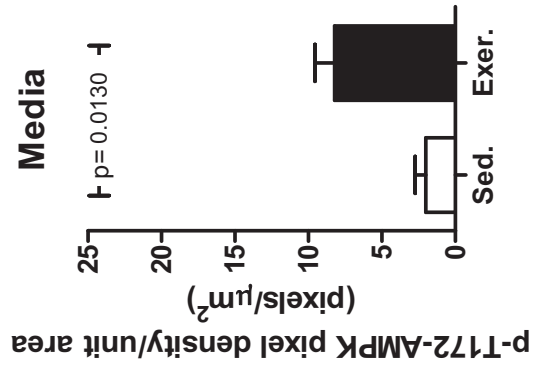

Fig 7

Supplement: supp_01279.2010_figS5.pdf [file supp_01279.2010_figS5.pdf]
